# Supplementary material for: An RCT of Effects of Telephone Care Management on Treatment Adherence and Clinical Outcomes Among Veterans With PTSD
Source: Atypon-hosted journal article supplement (doi:10.1176/appi.ps.201600069), 2016-10-17
Supplement: appi.ps.201600069.ds001.pdf [file appi.ps.201600069.ds001.pdf]

## Enrollment

Assessed for eligibility (n = 1346)

- Not meeting inclusion/exclusion criteria (n = 190)
- Declined to participate (n = 793)
- Did not complete intake survey (n = 4)

Randomized (n = 358)

Allocated to telephone care mgmt (n = 193)

- Dropped out (n= 1)
- Met exclusion criterion, withdrawn (n=1)
- Received intervention (n = 182)
- Did not receive intervention (n = 9)

Allocated to TAU control (n =165)

## 4-month Follow-Up

Completed 4-month survey – 66% (n = 127)

- Did not return 4-month survey (n = 64)
- (Withdrew prior to 4 months, n = 2)

Completed 4-month survey – 68% (n = 115)

- Did not return 4-month survey (n = 50)

## 12-month Follow-Up

Completed 12-month survey – 59% (n=112)

- Did not return 12-month survey (n = 79)
- (Withdrew prior to 4 months, n = 2)

Completed 12-month survey – 61% (n=101)

- Did not return 12-month survey (n = 64)
